# Supplementary material for: Global dust optical depth climatology derived from CALIOP and MODIS aerosol retrievals on decadal timescales: regional and interannual variability
Source: Copernicus journal article supplement (doi:10.5194/acp-21-13369-2021), 2021-09-09
Supplement: Supplementary file 1 [file acp-21-13369-2021-supplement.pdf]

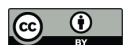

*Supplement of*

## **Global dust optical depth climatology derived from CALIOP and MODIS aerosol retrievals on decadal timescales: regional and interannual variability**

**Qianqian Song et al.**

*Correspondence to:* Zhibo Zhang (zhibo.zhang@umbc.edu)

The copyright of individual parts of the supplement might differ from the article licence.

## DAOD derived from CALIOP and MODIS observations

### CALIOP Daytime & Nighttime seasonal mean DAOD (2007~2019)

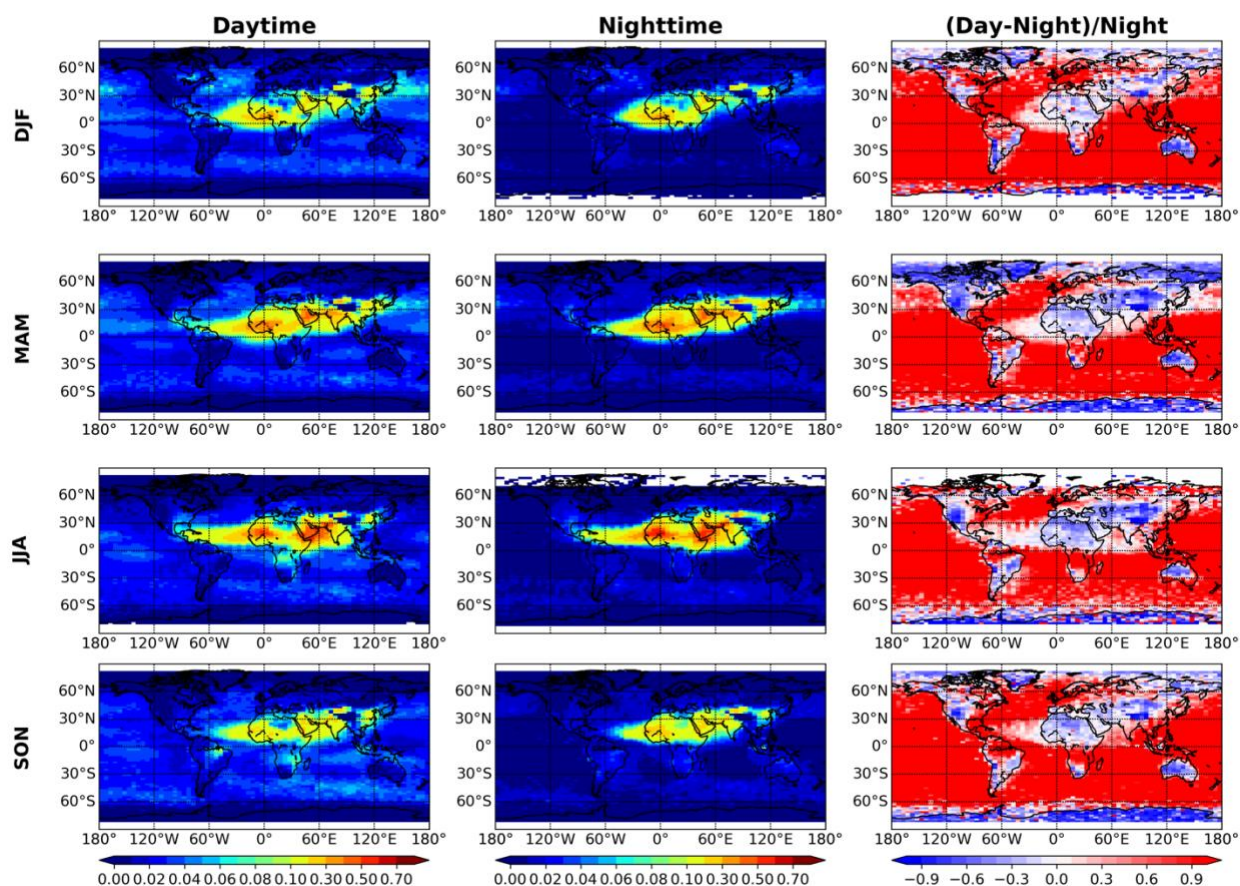

**Figure S1** Seasonal mean DAOD derived from CALIOP daytime (column 1) and nighttime (column 2) observations. Column 3 indicates the difference of daytime and nighttime DAOD, which is expressed as  $\frac{DAOD_{daytime} - DAOD_{nighttime}}{DAOD_{nighttime}}$

**Table S1.** Summary of Quality Assurance procedures in CALIOP- and MODIS-based DAOD retrievals.

|               | Quality Assurance (references)                                                                                                                                                                                                                                     |
|---------------|--------------------------------------------------------------------------------------------------------------------------------------------------------------------------------------------------------------------------------------------------------------------|
| CALIOP        | (a) Select cloud-free columns or columns with high-level optically thin clouds using CALIOP L2 cloud layer product. (Yu et al. 2015a)<br>(b) Use CAD score between -90 and -100 (Yu et al. 2019)<br>(c) Use EXT_QC values of 0, 1, 18, and 16 (Winker et al. 2013) |
| MODIS (Ocean) | QAC>=0 (Levy et al. 2013), AOD <0 was excluded                                                                                                                                                                                                                     |
| MODIS (Land)  | Retrieved aerosol properties with a standard deviation less than 0.15 among 10x10 pixels are assumed cloud free and are flagged with the highest quality flag (QA=3). Here we use products of QA=3 following the recommendation of Hsu et al. (2013)               |

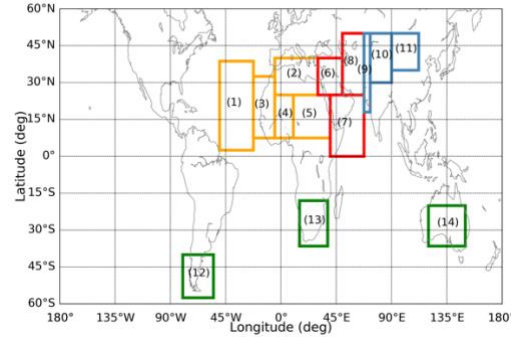

**Figure S2.** Region definition based on Ridley et al. 2016.

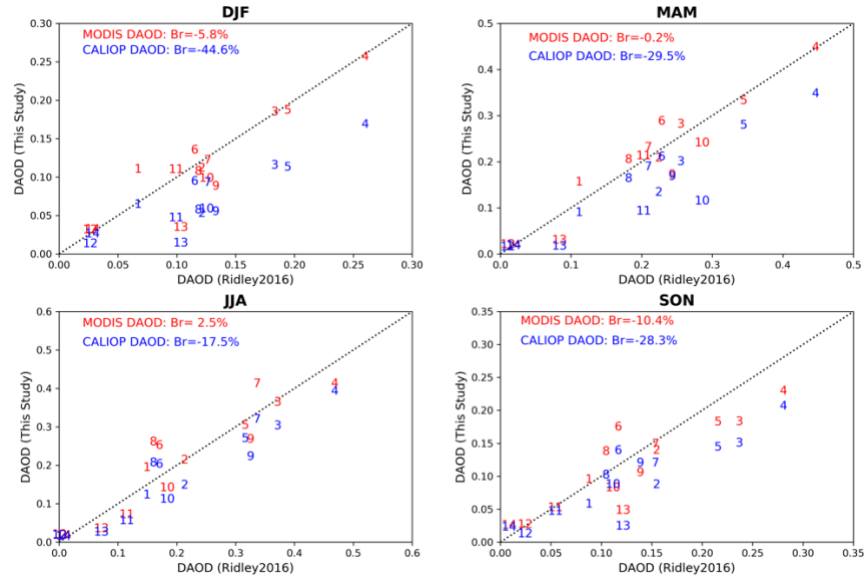

**Figure S3.** Compare seasonal mean DAOD (2004~2008) from Ridley et al. 2016 with our (2007~2019) seasonal mean DAOD based on CALIOP (blue markers) and MODIS (red markers) for each region. Each number in this plot represent the corresponding regions indicated in Figure S2.  $B_r^{Modis} = \overline{DAOD}_{Modis} / \overline{DAOD}_{Ridley} - 1$ ,  $B_r^{Caliop} =$

$\overline{DAOD}_{caliop} / \overline{DAOD}_{ridley} - 1$ . The specific values of seasonal mean DAOD from MODIS and CALIOP retrievals for the 14 regions are shown in Table S2.

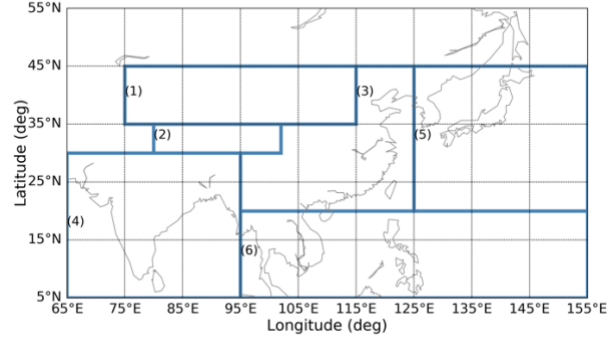

**Figure S4.** Region definition based on Proestakis et al. 2018.

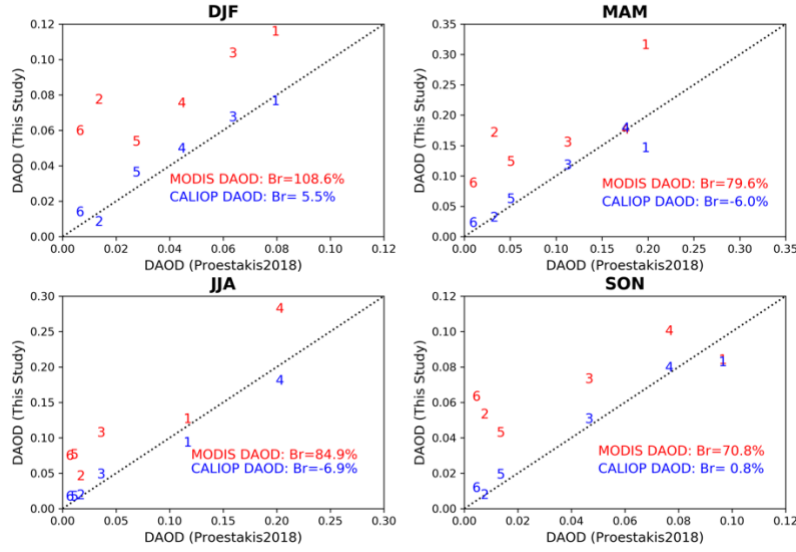

**Figure S5.** Compare seasonal mean DAOD (2007~2015) from Proestakis et al. 2018 with our seasonal mean DAOD (2007~2015) based on CALIOP (blue markers) and MODIS (red markers). Each number in the plot represent the corresponding regions in Figure S4.  $B_r^{Modis} = \overline{DAOD}_{Modis} / \overline{DAOD}_{Proestakis} - 1$ ,  $B_r^{caliop} = \overline{DAOD}_{caliop} / \overline{DAOD}_{Proestakis} - 1$ . The specific values of seasonal mean DAOD from MODIS and CALIOP retrievals for the 6 regions are shown in Table S3.

**Table S2.** MODIS-based and CALIOP-based DAOD for regions indicated in Figure S2.

| Region | Latitude<br>Longitude        | DJF   |        | MAM   |        | JJA   |        | SON   |        |
|--------|------------------------------|-------|--------|-------|--------|-------|--------|-------|--------|
|        |                              | MODIS | CALIOP | MODIS | CALIOP | MODIS | CALIOP | MODIS | CALIOP |
| (1)    | (2.5, 38.75)<br>(-50, -22.5) | 0.106 | 0.060  | 0.148 | 0.082  | 0.185 | 0.114  | 0.090 | 0.053  |
| (2)    | (25, 40)<br>(-5, 30)         | 0.107 | 0.048  | 0.200 | 0.126  | 0.204 | 0.140  | 0.134 | 0.082  |
| (3)    | (7.5, 32.5)<br>(-22.5, -5)   | 0.180 | 0.111  | 0.274 | 0.192  | 0.355 | 0.294  | 0.177 | 0.145  |
| (4)    | (7.5, 25)<br>(-5, 10)        | 0.252 | 0.164  | 0.441 | 0.340  | 0.404 | 0.384  | 0.224 | 0.201  |
| (5)    | (7.5, 25)<br>(10, 40)        | 0.183 | 0.109  | 0.325 | 0.272  | 0.295 | 0.261  | 0.177 | 0.139  |
| (6)    | (25, 40)<br>(30, 50)         | 0.130 | 0.090  | 0.280 | 0.203  | 0.242 | 0.193  | 0.169 | 0.134  |
| (7)    | (0, 25)<br>(40, 67.5)        | 0.118 | 0.088  | 0.224 | 0.182  | 0.403 | 0.311  | 0.144 | 0.115  |
| (8)    | (25, 50)<br>(50, 67.5)       | 0.103 | 0.053  | 0.197 | 0.156  | 0.252 | 0.197  | 0.132 | 0.096  |
| (9)    | (18, 50)<br>(67.5, 72.5)     | 0.084 | 0.051  | 0.164 | 0.160  | 0.258 | 0.213  | 0.100 | 0.115  |
| (10)   | (30, 50)<br>(72.5, 90)       | 0.094 | 0.054  | 0.233 | 0.107  | 0.132 | 0.102  | 0.077 | 0.082  |
| (11)   | (35, 50)<br>(90, 112)        | 0.105 | 0.043  | 0.205 | 0.085  | 0.062 | 0.047  | 0.047 | 0.042  |
| (12)   | (-57.5, -40)<br>(-80, -55)   | 0.027 | 0.009  | 0.013 | 0.008  | 0.011 | 0.009  | 0.022 | 0.007  |
| (13)   | (-36.5, -18)<br>(15, 38)     | 0.030 | 0.009  | 0.022 | 0.009  | 0.026 | 0.017  | 0.043 | 0.019  |
| (14)   | (-36.5, -20)<br>(120, 150)   | 0.028 | 0.021  | 0.012 | 0.010  | 0.009 | 0.006  | 0.020 | 0.018  |

**Table S3.** MODIS-based and CALIOP-based DAOD for regions indicated in Figure S4.

| Region | (Latitude)(Longitude)                                            | DJF   |        | MAM   |        | JJA   |        | SON   |        |
|--------|------------------------------------------------------------------|-------|--------|-------|--------|-------|--------|-------|--------|
|        |                                                                  | MODIS | CALIOP | MODIS | CALIOP | MODIS | CALIOP | MODIS | CALIOP |
| (1)    | (35, 45) (70, 115)                                               | 0.113 | 0.074  | 0.309 | 0.139  | 0.121 | 0.088  | 0.082 | 0.080  |
| (2)    | (30, 35) (80, 102)                                               | 0.075 | 0.006  | 0.164 | 0.025  | 0.040 | 0.013  | 0.051 | 0.005  |
| (3)    | (35, 45) (115, 125)<br>(30, 35) (102, 125)<br>(20, 30) (95, 125) | 0.101 | 0.065  | 0.148 | 0.111  | 0.101 | 0.043  | 0.071 | 0.048  |
| (4)    | (5, 30) (65, 95)                                                 | 0.073 | 0.048  | 0.170 | 0.172  | 0.277 | 0.175  | 0.098 | 0.077  |
| (5)    | (20, 45) (125, 155)                                              | 0.051 | 0.034  | 0.117 | 0.056  | 0.071 | 0.012  | 0.041 | 0.017  |
| (6)    | (5, 20) (95, 155)                                                | 0.057 | 0.012  | 0.081 | 0.016  | 0.069 | 0.011  | 0.061 | 0.009  |

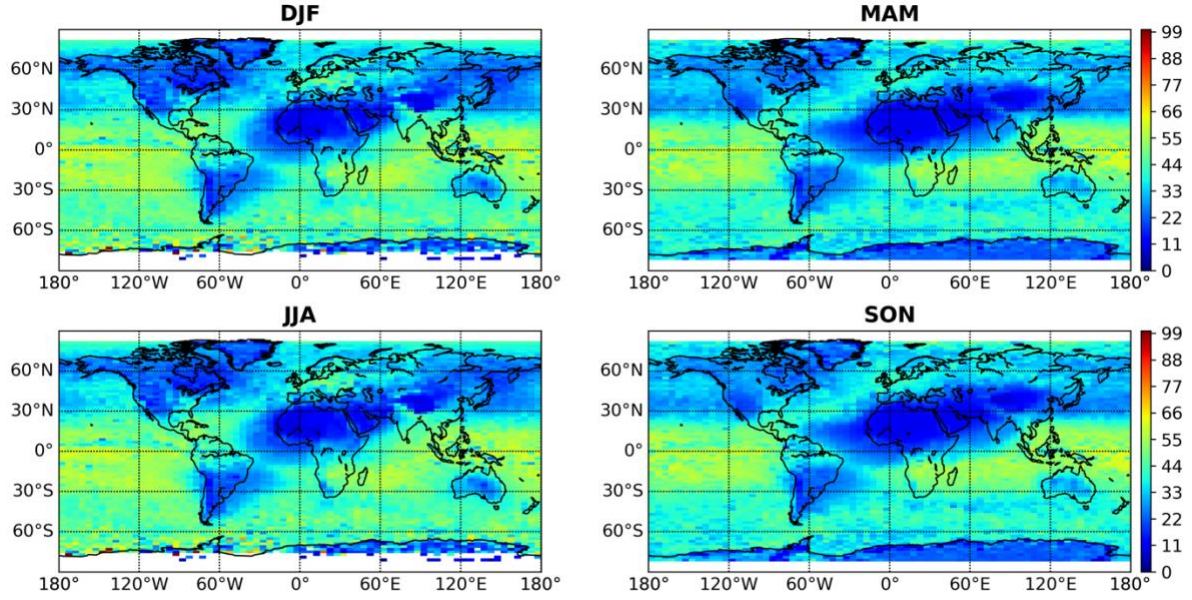

**Figure S6.** 2007~2019 Seasonal mean DAOD uncertainties induced by DPR assumptions. For each season in each grid, DAOD uncertainty is defined as  $\frac{(DAOD^{high}-DAOD^{low})/2}{DAOD^{mean}}\%$ , where  $DAOD^{high}$  is derived from high dust scenario with  $\delta_d = 0.20$  and  $\delta_{nd} = 0.02$ ,  $DAOD^{low}$  is derived from low dust scenario with  $\delta_d = 0.30$  and  $\delta_{nd} = 0.07$ ,  $DAOD^{mean}$  is the average of the two scenarios.



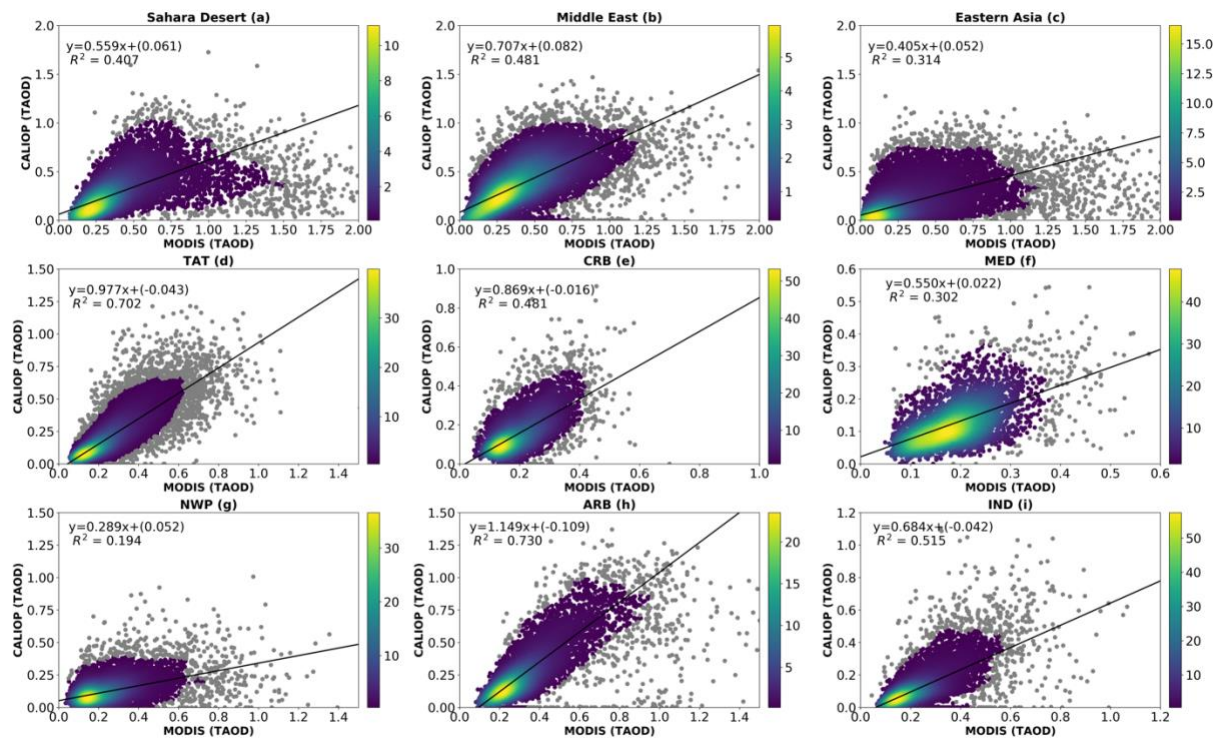

**Figure S7.** Comparison of CALIOP TAOD against MODIS TAOD over dust-laden regions indicated in Figure 8. Color represents the probability density using gaussian kernel density estimation. Grey points represent data points within the lowest 5% of data density. Those grey points are excluded in the linear regression analysis.

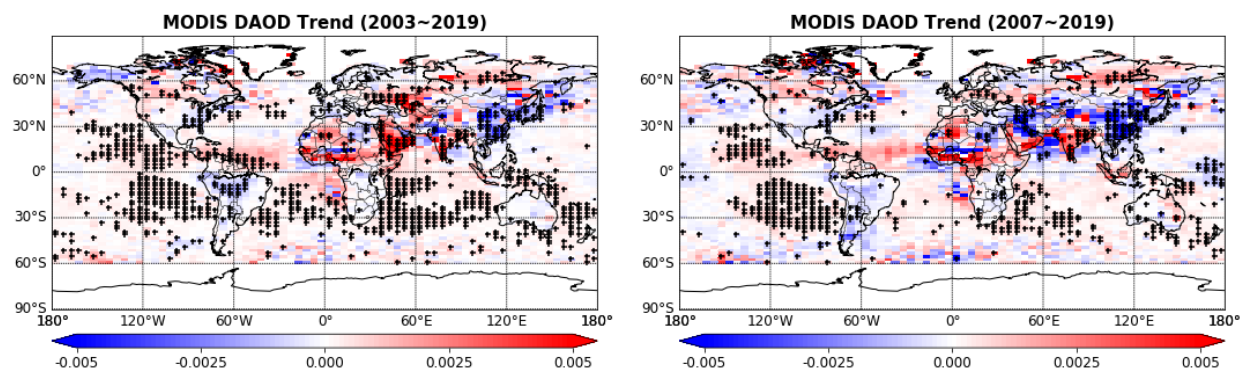

**Figure S8.** Same as Figure 14, except for TAOD.



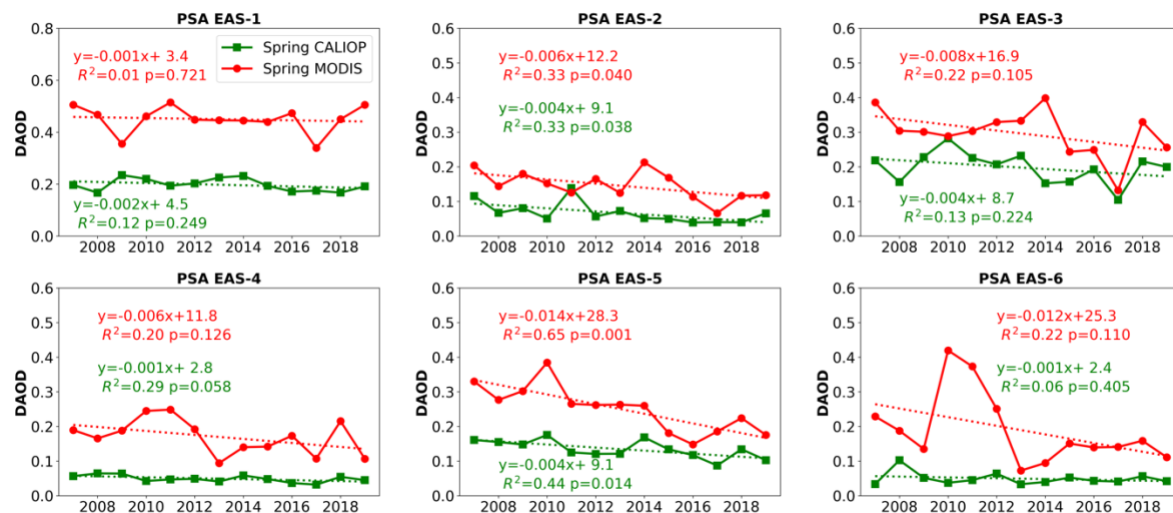

**Figure S9.** Same as Figure 16, except for inter-spring variability.

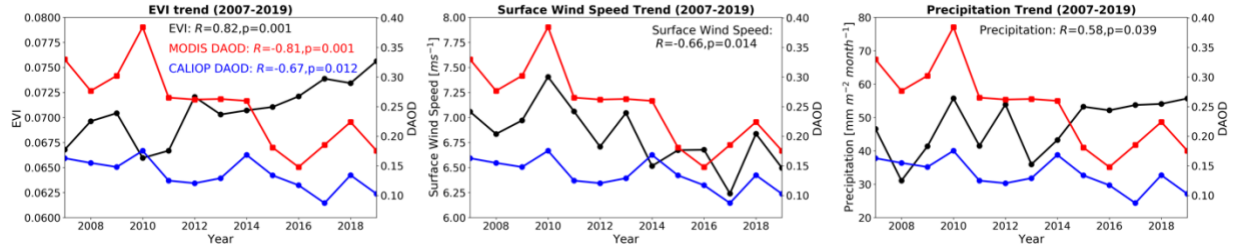

**Figure S10.** Inter-spring series of EVI, surface wind speed and precipitation along with inter-spring series of DAOD from MODIS (red curves) and CALIOP (blue curves).  $R$  is Pearson's linear correlation coefficient between each variables and time series. Positive  $R$  indicates the variable increase with time, and vice versa.

## Comparison with previous studies

Our MODIS DAOD study and Voss and Evan 2020 use the similar method to derive DAOD. However, there is a subtle difference in our MODIS over ocean retrieval methodology, which is the main reason causing the non-negligible difference in our over-ocean mean DAOD. We use MODIS over ocean retrievals to determine  $f_c, f_d, f_m$ , while Voss and Evan 2020 determine those parameters based on AERONET stations dominated by each aerosol type.  $f_c, f_d, f_m$  used in those two studies are shown in Table S4.

Based on Eq. (2) and (3) in the paper, we derived the relationship of DAOD ( $\tau_d$ ) with each of parameters ( $f_c, f_d, f_m$ ):

$$\tau_d = \frac{(\tau - \tau_m)f_c + \tau_m f_m - \tau f}{f_c - f_d}$$

Then, the change of  $\tau_d$  with respect to each of the three parameters  $f_c, f_d, f_m$  are expressed as:

$\frac{\partial \tau_d}{\partial f_c} = \frac{\tau_c}{(f_c - f_d)}$ ,  $\frac{\partial \tau_d}{\partial f_d} = \frac{\tau_d}{(f_c - f_d)}$ ,  $\frac{\partial \tau_d}{\partial f_m} = \frac{\tau_m}{(f_c - f_d)}$ . Based on Table S4,  $f_c$  is much larger than  $f_d$  in both studies, so that  $(f_c - f_d) > 0$ . In addition,  $\tau_c, \tau_d$  and  $\tau_m$  are always larger than zero. Therefore, we have  $\frac{\partial \tau_d}{\partial f_c} > 0$ ,  $\frac{\partial \tau_d}{\partial f_d} > 0$ ,  $\frac{\partial \tau_d}{\partial f_m} > 0$ . This means that  $\tau_d$  is positively proportional to  $f_c, f_d, f_m$ , respectively. In other words,  $\tau_d$  increases as each of those parameters increasing.

**Table S4.**  $f_c, f_d, f_m$  used in over-ocean Aqua MODIS Collection 6 DAOD retrieval and in Voss and Evan 2020. The last column shows the relationship of each parameter with the retrieved DAOD, ‘+’ means DAOD increases as the parameter increasing, ‘-’ means DAOD decreases as the parameter increasing.

|       | Aqua MODIS C6 | Voss and Evan 2020 | Relation with $\tau_d$ |
|-------|---------------|--------------------|------------------------|
| $f_c$ | 0.89          | 0.79               | +                      |
| $f_d$ | 0.31          | 0.35               | +                      |
| $f_m$ | 0.48          | 0.34               | +                      |

It turns out that we used significantly larger  $f_c$  and  $f_m$ , while a slightly smaller  $f_d$ , in comparison with VE20. Because the derived DAOD is positively proportional to these parameters, the use of larger  $f_c$  and  $f_m$ , is probably the reason for a larger DAOD in our study.
